# Supplementary material for: Development of a cell system for siRNA screening of pathogen responses in human and mouse macrophages
Source: PubMed Central journal article supplement (PMC4894436; doi:10.1038/srep09559), 2015-04-01
Supplement: srep09559-s1.pdf [file srep09559-s1.pdf]

## SUPPLEMENTARY INFORMATION

### **Development of a cell system for siRNA screening of pathogen responses in human and mouse macrophages**

Ning Li<sup>1†</sup>, Jing Sun<sup>1†</sup>, Zachary L. Benet<sup>1</sup>, Ze Wang<sup>2</sup>, Souhaila Al-Khodori<sup>1</sup>, Sinu P. John<sup>1</sup>, Bin Lin<sup>1</sup>, Myong-Hee Sung<sup>3</sup> and Iain D.C. Fraser<sup>1\*</sup>

<sup>1</sup> Signaling Systems Unit

<sup>2</sup> Lymphocyte Biology Section

Laboratory of Systems Biology, National Institute of Allergy and Infectious Diseases, National Institutes of Health, Bethesda, MD 20892, USA.

<sup>3</sup>Laboratory of Receptor Biology and Gene Expression, National Cancer Institute, National Institutes of Health, Bethesda, MD 20892, USA.

† These authors contributed equally.

\* To whom correspondence should be addressed.

E-mail: [fraseri@niaid.nih.gov](mailto:fraseri@niaid.nih.gov); Tel: 301-443-5998; Fax: 301-480-5725.

**a** RAW G9 clone

| ARRAY PROBE_ID | EntrezID | GeneSymbol | DetectionPval | Expression call |
|----------------|----------|------------|---------------|-----------------|
| ILMN_1236908   | 21897    | Tlr1       | 0             | Present         |
| ILMN_2733733   | 24088    | Tlr2       | 0             | Present         |
| ILMN_2697002   | 142980   | Tlr3       | 0.4305556     | Absent          |
| ILMN_2684234   | 21898    | Tlr4       | 0             | Present         |
| ILMN_2440602   | 53791    | Tlr5       | 0.7382479     | Absent          |
| ILMN_1254605   | 21899    | Tlr6       | 0.001068376   | Present         |
| ILMN_1245354   | 170743   | Tlr7       | 0             | Present         |
| ILMN_2460572   | 170744   | Tlr8       | 0.0534188     | Present         |
| ILMN_2849322   | 81897    | Tlr9       | 0.09508547    | Present         |

**b** Parental RAW264.7

| ARRAY PROBE_ID | EntrezID | GeneSymbol | DetectionPval | Expression call |
|----------------|----------|------------|---------------|-----------------|
| ILMN_1236908   | 21897    | Tlr1       | 0             | Present         |
| ILMN_2733733   | 24088    | Tlr2       | 0             | Present         |
| ILMN_2697002   | 142980   | Tlr3       | 0.6132479     | Absent          |
| ILMN_2684234   | 21898    | Tlr4       | 0             | Present         |
| ILMN_2440602   | 53791    | Tlr5       | 0.7596154     | Absent          |
| ILMN_1254605   | 21899    | Tlr6       | 0             | Present         |
| ILMN_1245354   | 170743   | Tlr7       | 0             | Present         |
| ILMN_2460572   | 170744   | Tlr8       | 0.0534188     | Present         |
| ILMN_2849322   | 81897    | Tlr9       | 0.09935898    | Present         |

**c** THP1 B5 clone

| ARRAY PROBE_ID | EntrezID | GeneSymbol | DetectionPval | Expression call |
|----------------|----------|------------|---------------|-----------------|
| ILMN_1731048   | 7096     | TLR1       | 0.001298701   | Present         |
| ILMN_1772387   | 7097     | TLR2       | 0.002597403   | Present         |
| ILMN_2155708   | 7098     | TLR3       | 0.8051948     | Absent          |
| ILMN_1706217   | 7099     | TLR4       | 0             | Present         |
| ILMN_1722981   | 7100     | TLR5       | 0.005194805   | Present         |
| ILMN_1749287   | 10333    | TLR6       | 0.006493506   | Present         |
| ILMN_1677827   | 51284    | TLR7       | 0.002597403   | Present         |
| ILMN_1657892   | 51311    | TLR8       | 0.001298701   | Present         |
| ILMN_1679798   | 54106    | TLR9       | 0.1896104     | Absent          |

**d** Parental THP1

| ARRAY PROBE_ID | EntrezID | GeneSymbol | DetectionPval | Expression call |
|----------------|----------|------------|---------------|-----------------|
| ILMN_1731048   | 7096     | TLR1       | 0             | Present         |
| ILMN_1772387   | 7097     | TLR2       | 0.075974015   | Present         |
| ILMN_2155708   | 7098     | TLR3       | 0.21688312    | Absent          |
| ILMN_1706217   | 7099     | TLR4       | 0             | Present         |
| ILMN_1722981   | 7100     | TLR5       | 0.07532466    | Present         |
| ILMN_1749287   | 10333    | TLR6       | 0.013636365   | Present         |
| ILMN_1677827   | 51284    | TLR7       | 0             | Present         |
| ILMN_1657892   | 51311    | TLR8       | 0             | Present         |
| ILMN_1679798   | 54106    | TLR9       | 0.66753245    | Absent          |

**Supplementary Figure 1**

**Microarray expression data showing mRNA detection calls for TLR receptors in RAW264.7 and THP1 cell lines.** A detection p value threshold of 0.1 was used to predict presence or absence of TLR family genes in (a) RAW G9 reporter cells, (b) parental RAW264.7 cells, (c) THP1 B5 reporter cells and (d) parental THP1 cells.

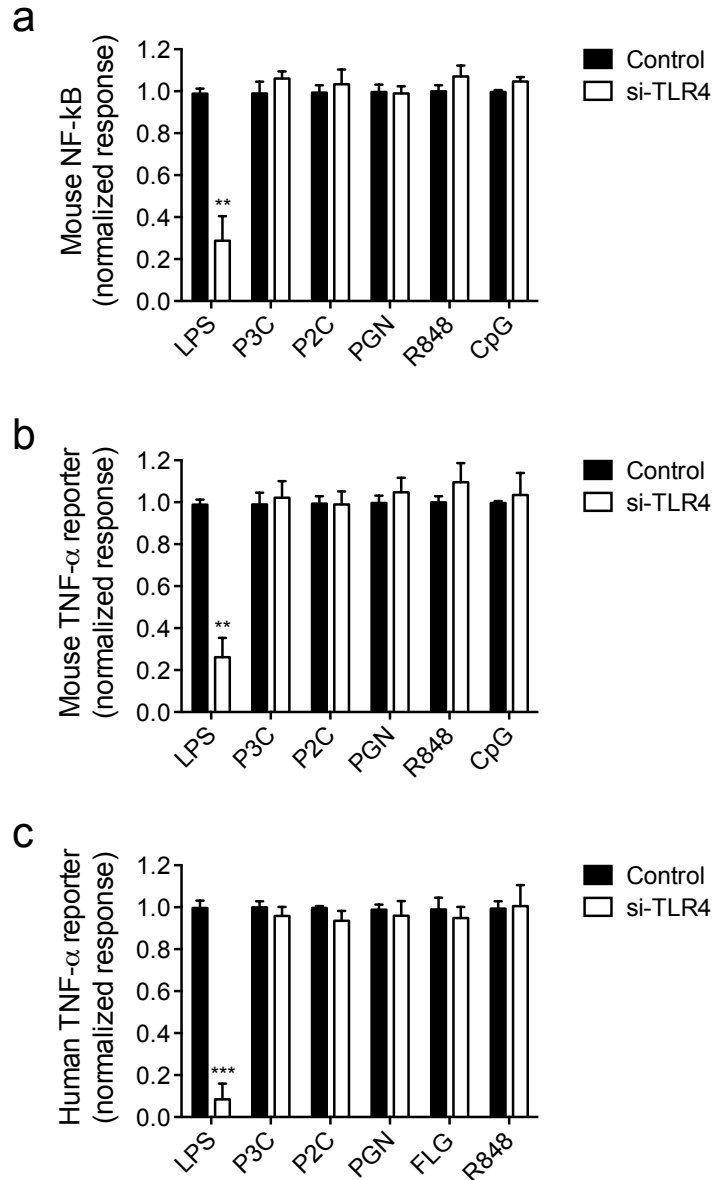

### Supplementary Figure 2

**Effect of knocking down TLR4 expression on mouse and human macrophage reporter responses to a panel of TLR ligands.** (a) Cytosol-to-nuclear translocation of the GFP-relA fusion at 40 min and (b) *Tnf* promoter-driven mCherry expression at 16 hr in RAW G9 cells transfected with either non-targeting control or *Tlr4* gene-specific siRNA and treated with 10 ng/ml LPS, 250 nM P3C, 125 nM P2C, 100 µg/ml PGN, 3 µM R848 or 100 nM CpG. (c) Human TNF-α reporter responses in THP1 B5 cells transfected with either non-targeting control or *TLR4* gene-specific siRNA and treated for 4 hr with 10 ng/ml LPS, 100 nM P3C, 10 nM P2C, 10 µg/ml PGN, 10 ng/ml FLG or 10 µg/ml R848. Data are representative of two experiments (a-c; mean + s.d.). \*\*P < 0.01, \*\*\*P < 0.001 (two-tailed t test).

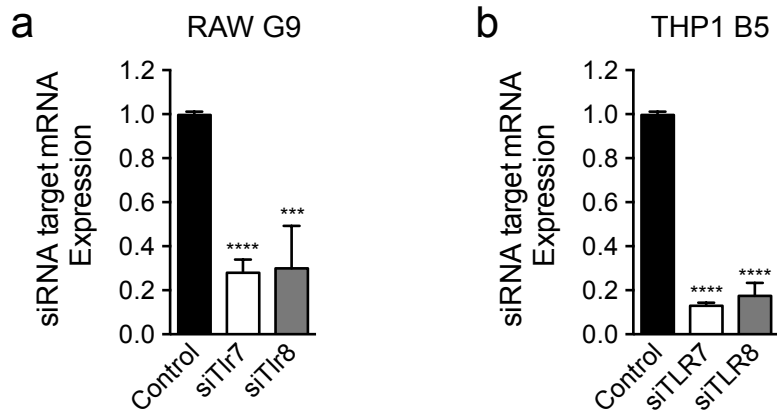

### Supplementary Figure 3

**Knockdown of TLR7 and TLR8 genes in mouse and human macrophage reporter cells.** (a) RAW G9 cells were transfected with either non-targeting control, *Tlr7* or *Tlr8* gene-specific siRNA and mRNA levels were measured by qPCR. (c) THP1 B5 cells were transfected with either non-targeting control, *TLR7* or *TLR8* gene-specific siRNA and mRNA levels were measured by qPCR. . Data are representative of two experiments (a, b; mean + s.d.). \*\*\* $P < 0.001$ , \*\*\*\* $P < 0.0001$  (two-tailed t test).

### **Supplementary Table 1**

#### **Details of siRNAs used to target the human and mouse TLR pathway**

**genes.** File includes gene symbols and gene ID with corresponding siRNA vendor ID and sequence information.

### **Supplementary Video 1**

#### **Translocation kinetics of GFP-p65/RelA in RAW G9 cells stimulated with 10**

**ng/ml LPS.** LPS was added after acquisition of the first image and time-lapse images of a 107  $\mu\text{m}$  x 107  $\mu\text{m}$  field were collected every 8 min. Movie playback speed is 8 frames/sec.

### **Supplementary Video 2**

#### **Kinetics of *tnf* promoter-driven mCherry expression in RAW G9 cells**

**stimulated with 10 ng/ml LPS.** Movie shows red fluorescent channel of the same field of cells shown in Supplementary Video 1.

### **Supplementary Video 3**

#### **Kinetics of both GFP-p65/RelA translocation and *tnf* promoter-driven**

**mCherry expression in RAW G9 cells stimulated with 10 ng/ml LPS.** Movie

shows combined green and red fluorescent channels of the same field of cells shown in Supplementary Video 1.
